# Supplementary material for: Defining the Qualities of High-Quality Palladium on Carbon Catalysts for Hydrogenolysis
Source: PubMed Central journal article supplement (PMC8291771; doi:10.1021/acs.oprd.0c00536), 2021-06-23

# Supporting Information

## Defining the qualities of high-quality palladium on carbon catalysts for hydrogenolysis

Conor J. Crawford,<sup>[a,b]\*</sup> Yan Qiao,<sup>[c,d]</sup> Yequn Liu,<sup>[c,d]</sup> Dongmei Huang,<sup>[c,d]</sup> Wenjun Yan,<sup>[c,d]</sup>, Peter H. Seeberger,<sup>[b]</sup> Stefan Oscarson,<sup>[a]\*</sup> and Shuai Chen,<sup>[d]\*</sup>

- [a] Centre for Synthesis and Chemical Biology, University College Dublin, Belfield, Dublin, Ireland. E-mail: [conor.crawford@ucdconnect.ie](mailto:conor.crawford@ucdconnect.ie) [stefan.oscarson@ucd.ie](mailto:stefan.oscarson@ucd.ie)
- [b] Department of Biomolecular Systems, Max Planck Institute of Colloids and Interfaces, 14476 Potsdam, Germany.
- [c] Center of Materials Science and Optoelectronics Engineering, University of Chinese Academy of Sciences, Beijing 100049, People's Republic of China.
- [d] State Key Laboratory of Coal Conversion, Institute of Coal Chemistry, Chinese Academy of Sciences, Taiyuan 030001, People's Republic of China. Email: [chenshuai@sxicc.ac.cn](mailto:chenshuai@sxicc.ac.cn)

### Table of Contents

|                                                                        |    |
|------------------------------------------------------------------------|----|
| TEM and XRD of 5% Pd/C (pre-treated) recycled catalyst .....           | 3  |
| Figure S1. TEM and XRD of 5% Pd/C (pre-treated) recycled catalyst..... | 3  |
| TEM of 5% Pd/C STREM Chemicals (1#) .....                              | 4  |
| TEM 10% Pd/C Sigma-Aldrich (2#).....                                   | 9  |
| TEM of 20% Pd[OH] <sub>2</sub> /C Sigma-Aldrich (3#).....              | 15 |
| Palladium: PDF 05-0681.....                                            | 20 |
| Palladium oxide: PDF 88-2434 .....                                     | 21 |
| SEM-EDS .....                                                          | 22 |



# TEM and XRD of 5% Pd/C (pre-treated) recycled catalyst

## A

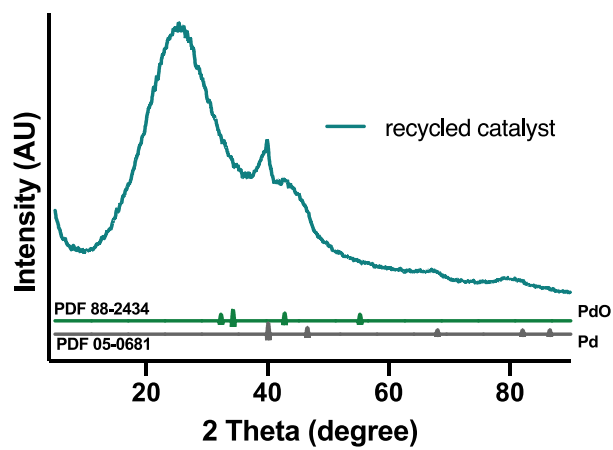

## B

### TEM

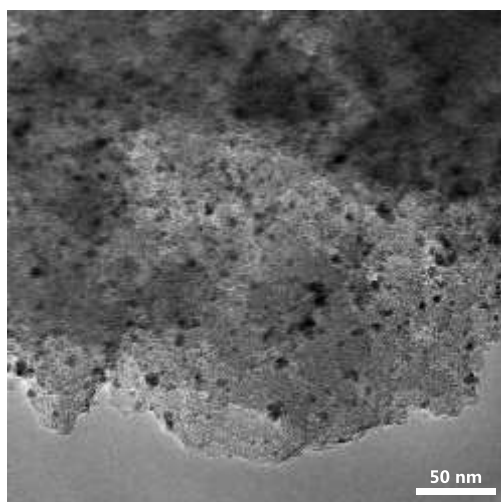

Figure S1. TEM and XRD of 5% Pd/C (pre-treated) recycled catalyst

TEM of 5% Pd/C STREM Chemicals (1#)

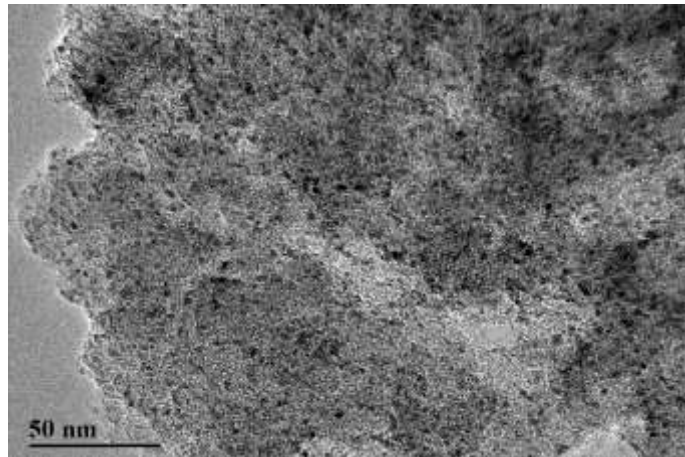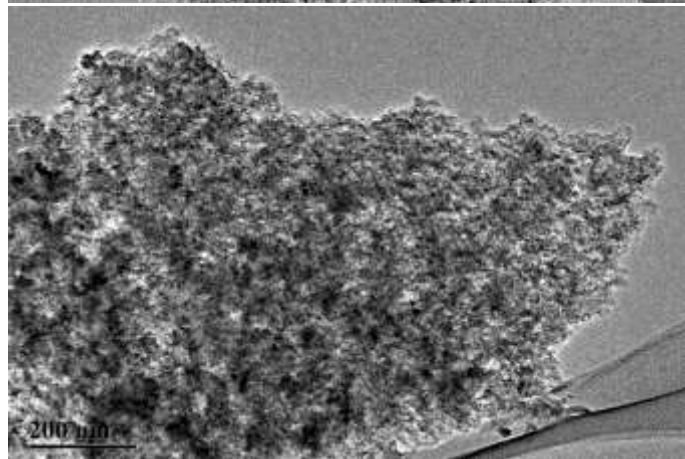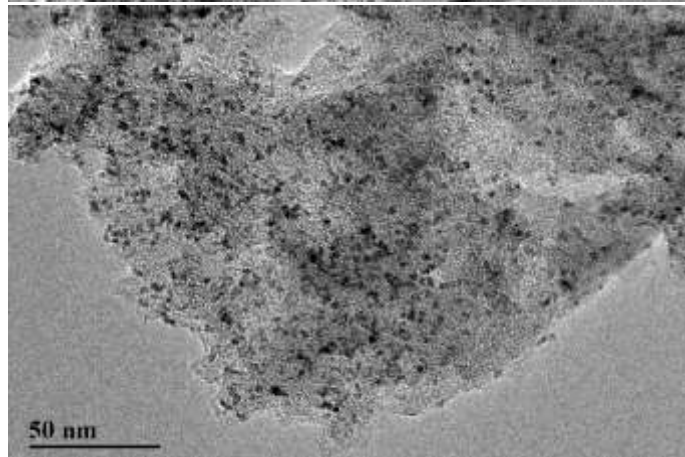

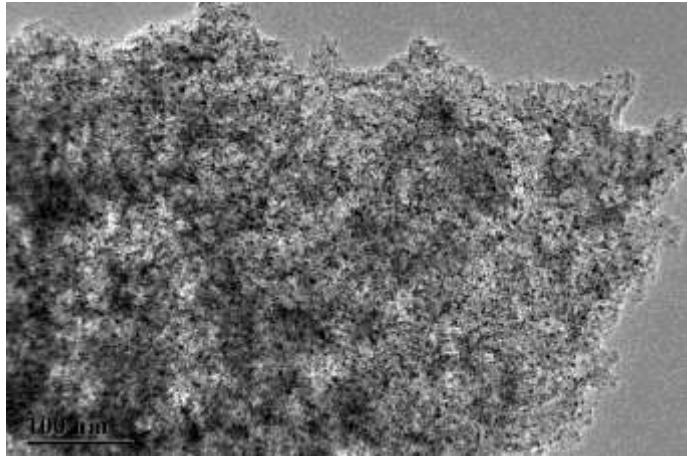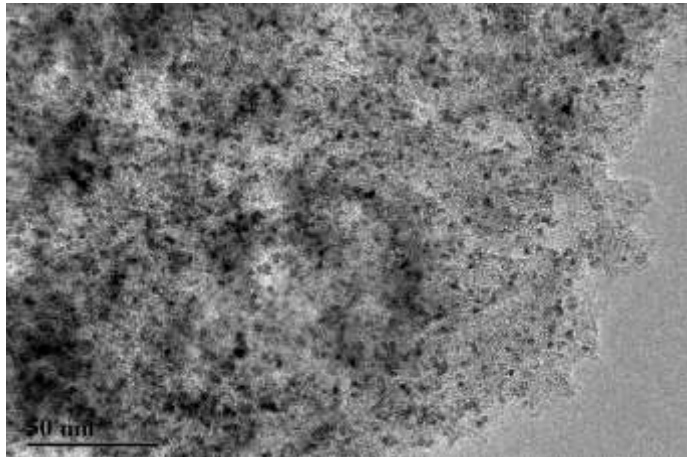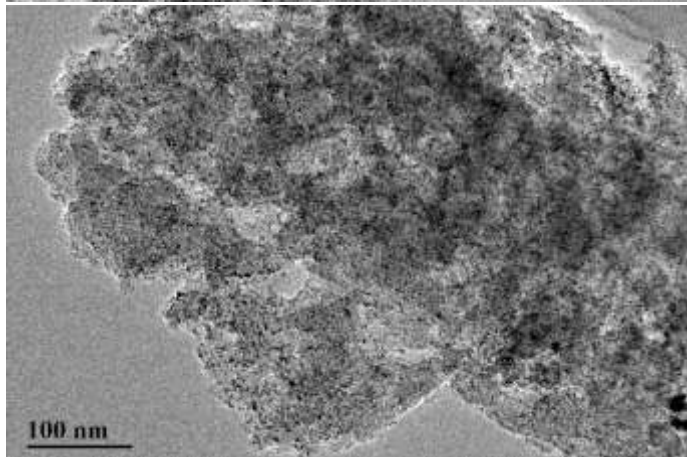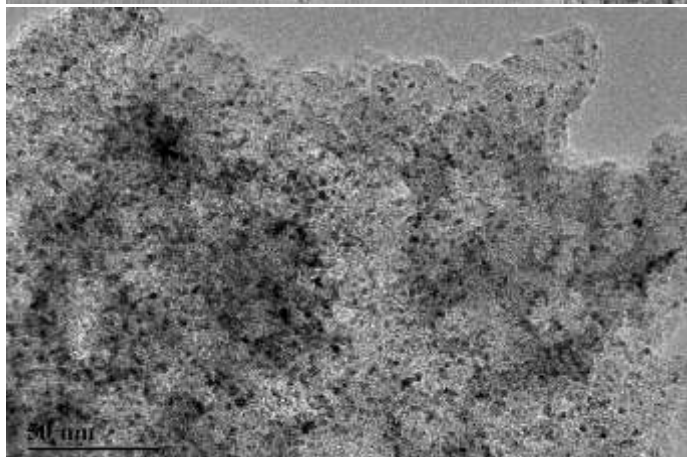

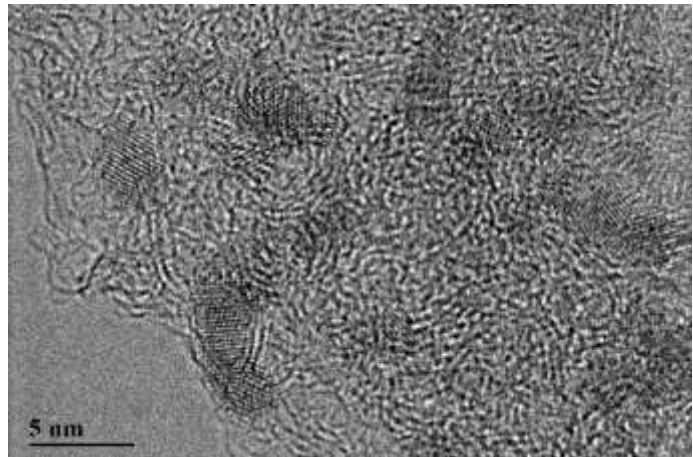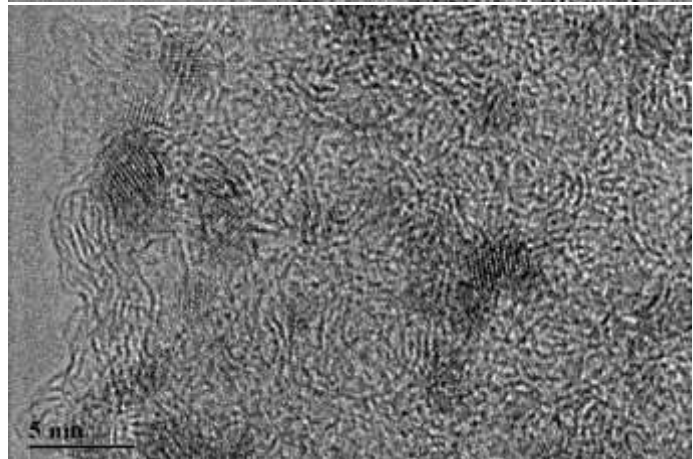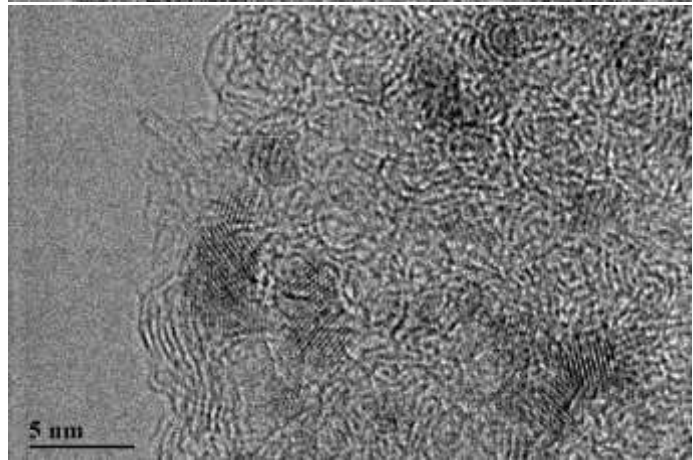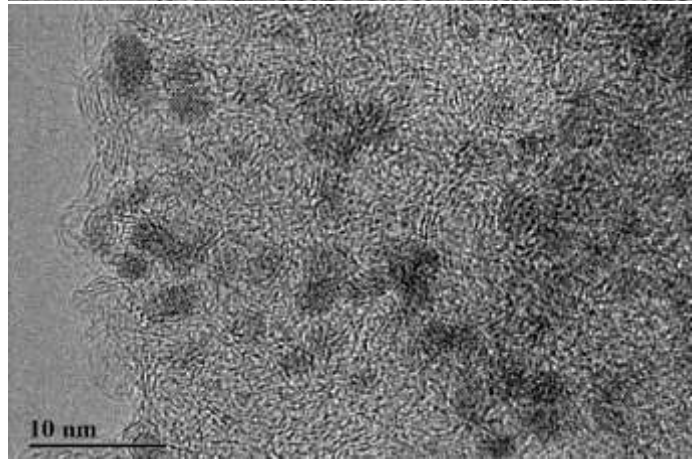

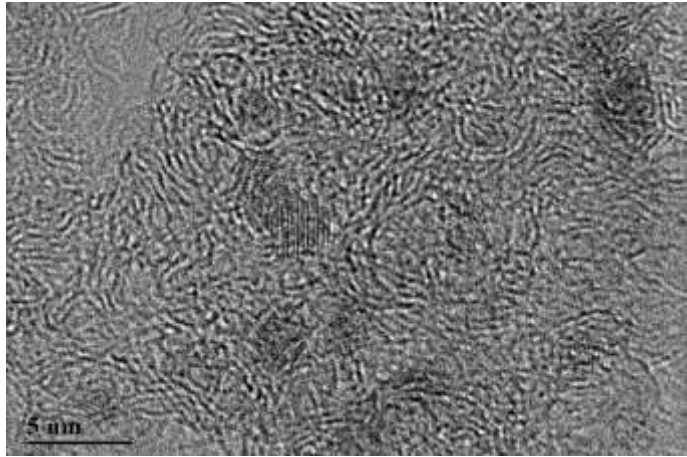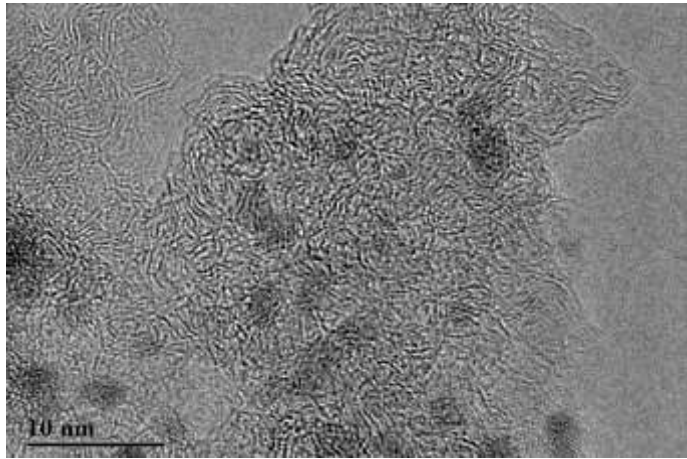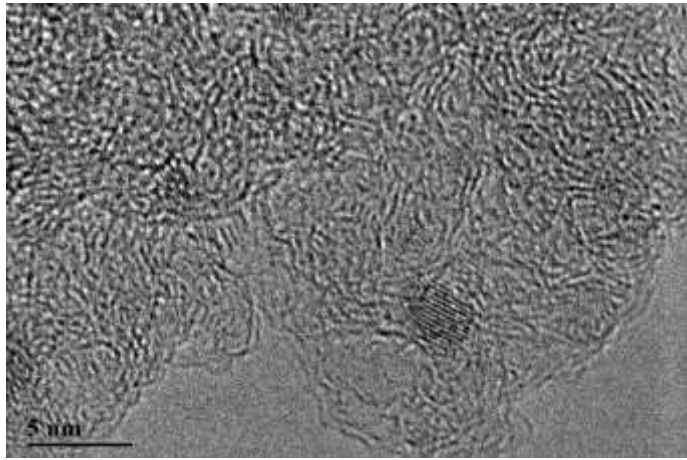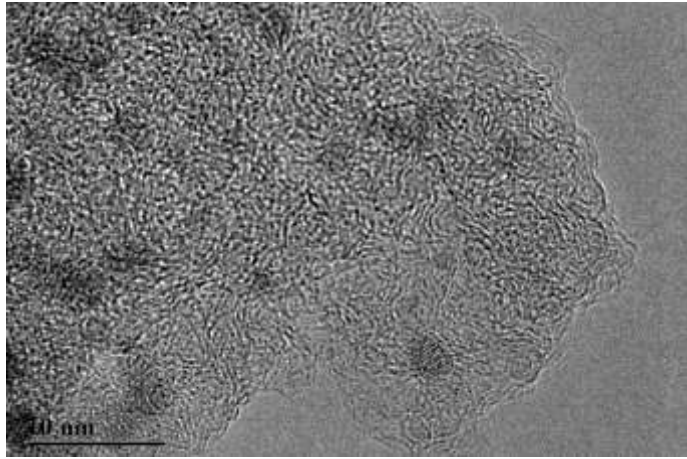



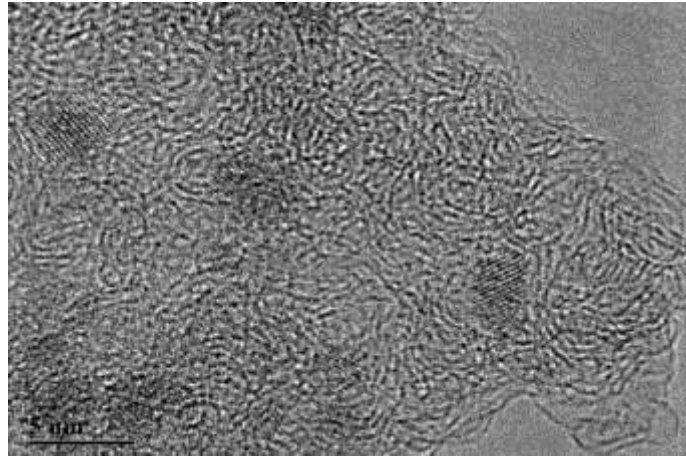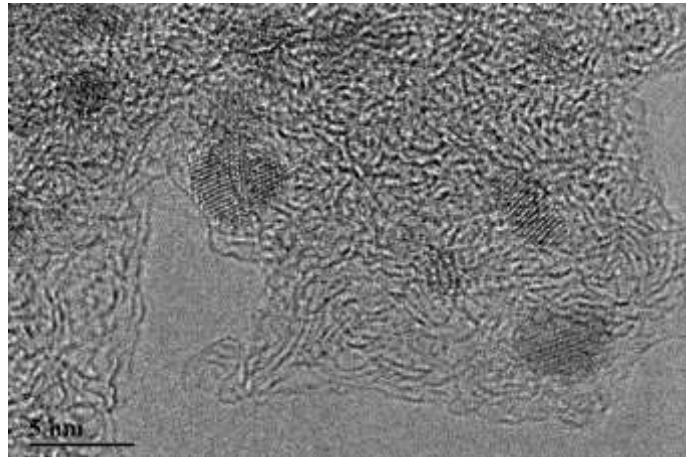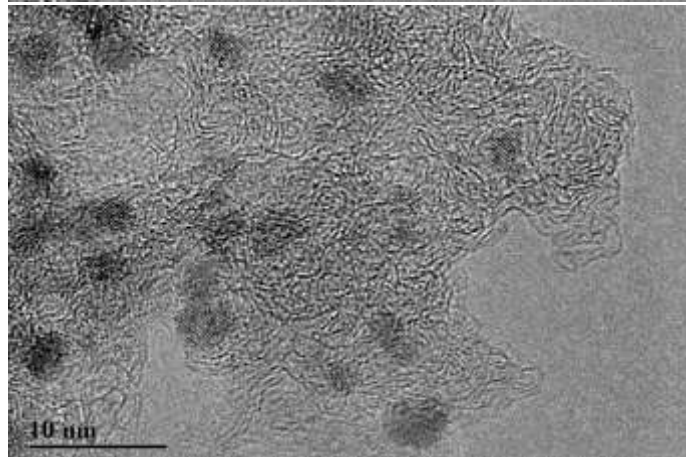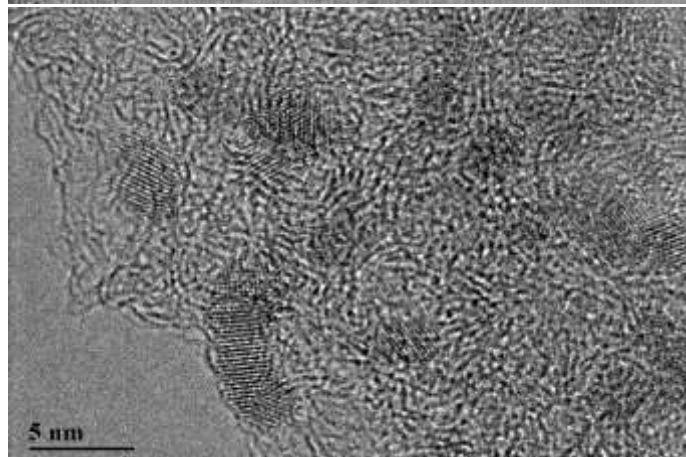



TEM 10% Pd/C Sigma-Aldrich (2#)

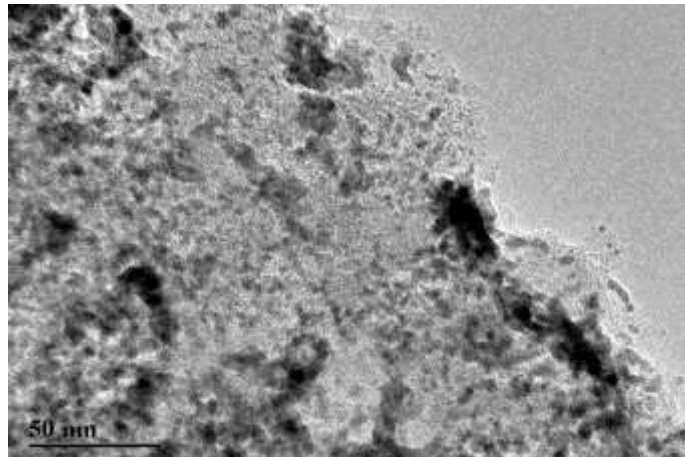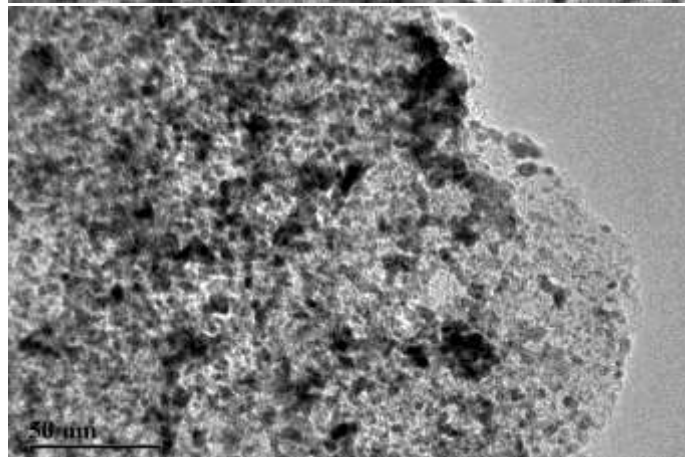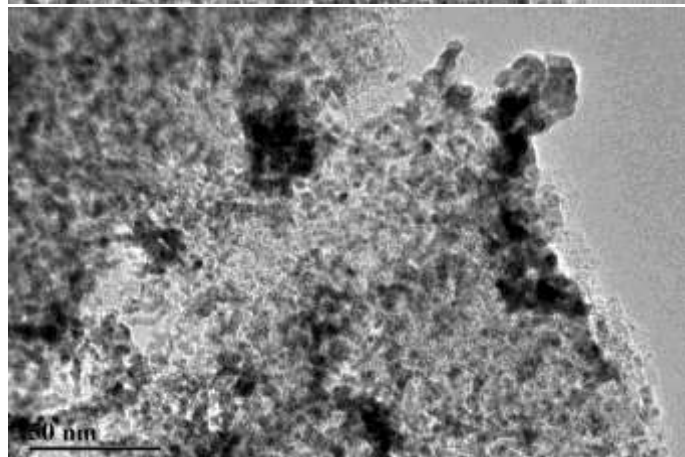

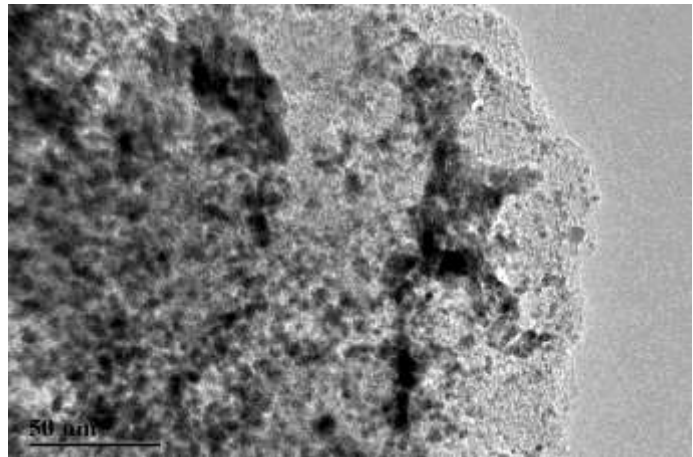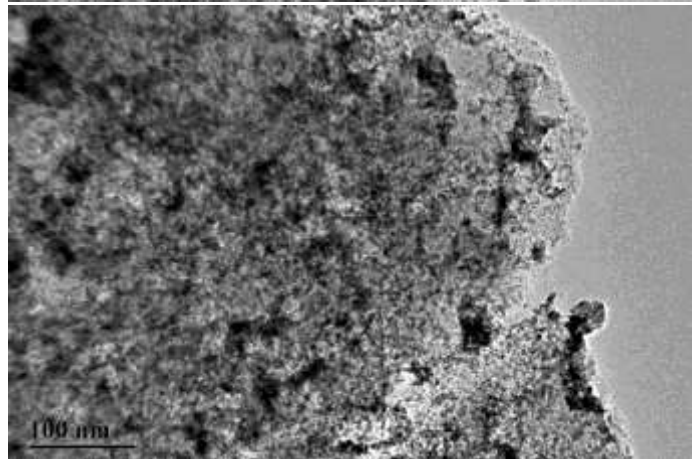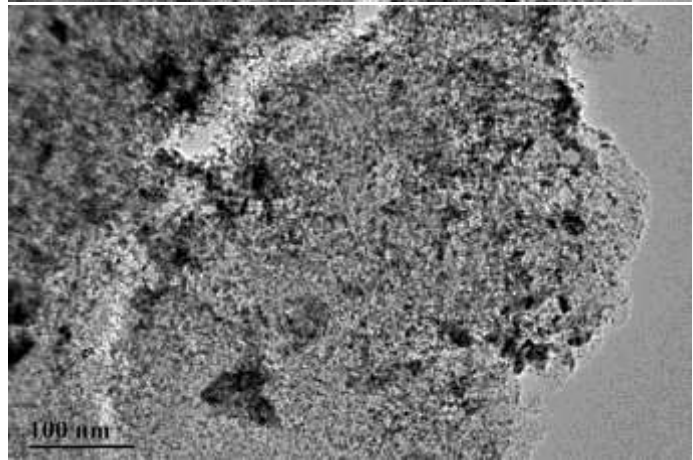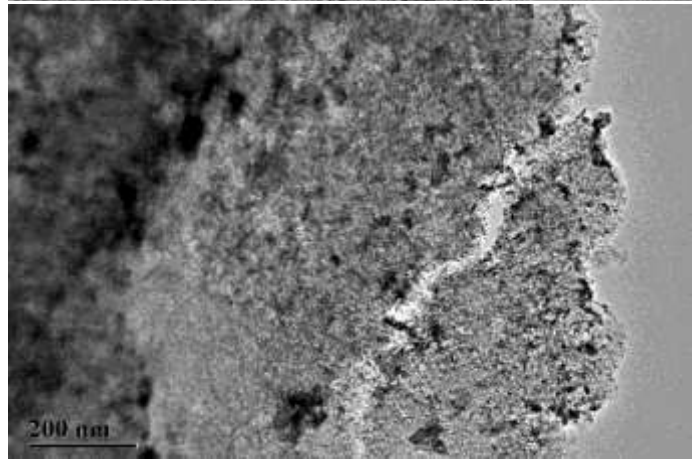

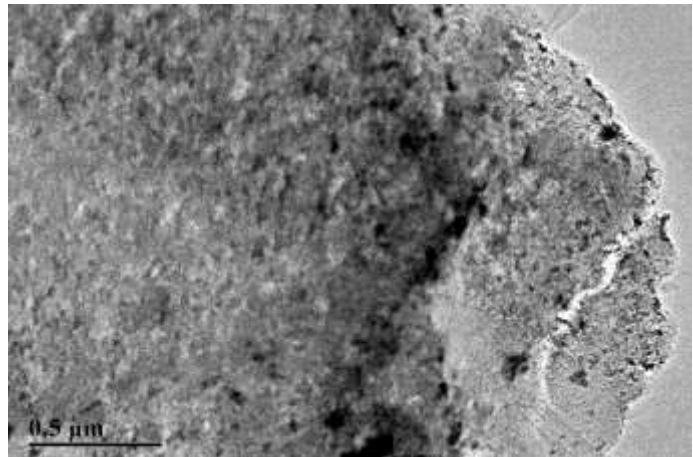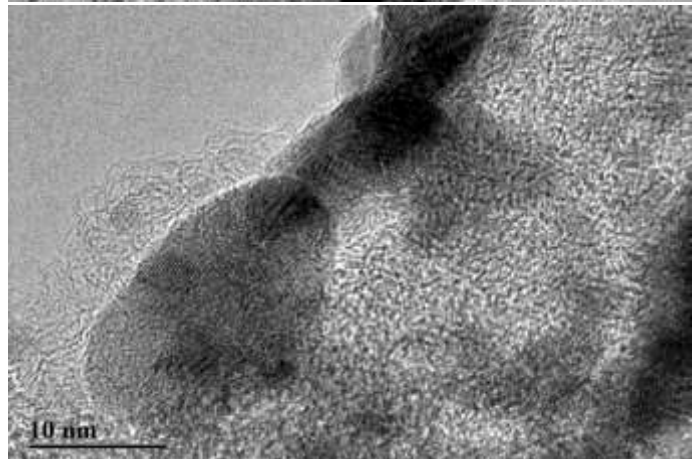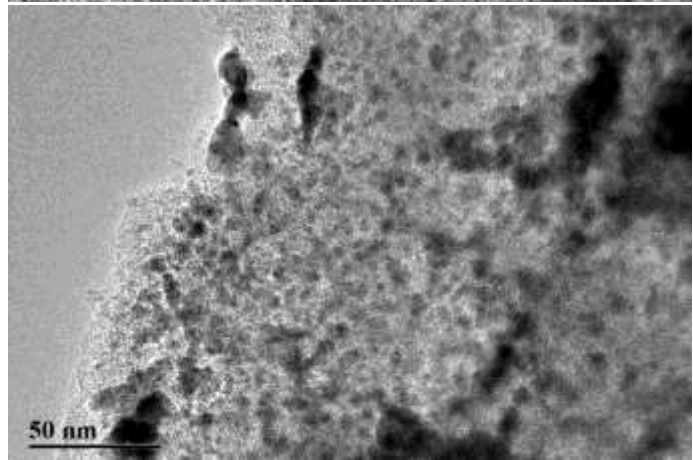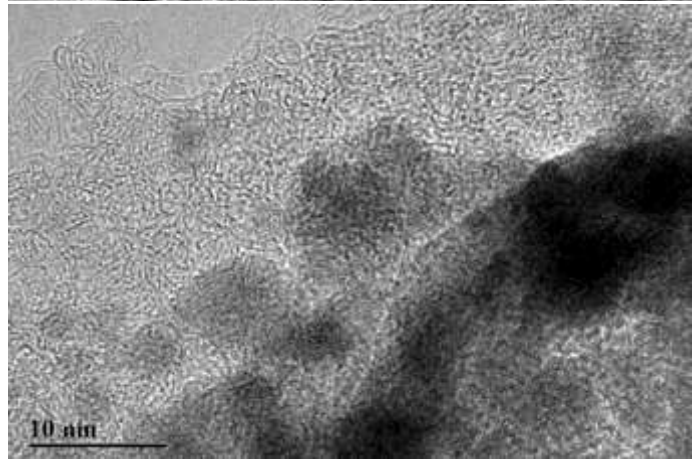

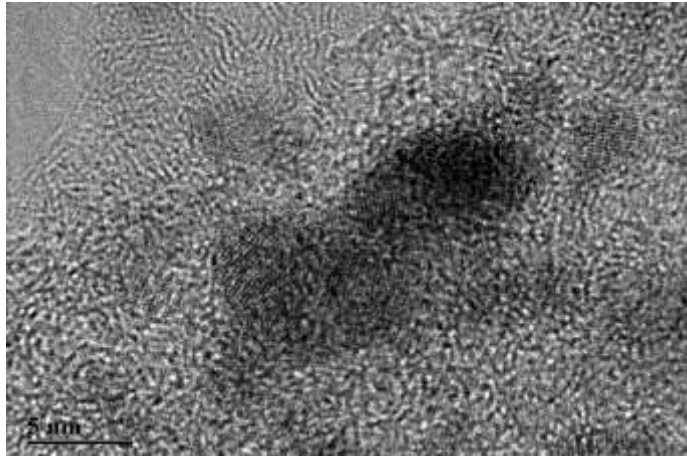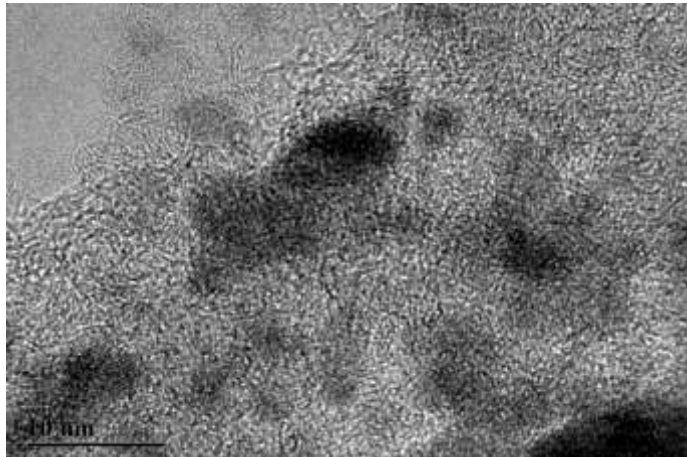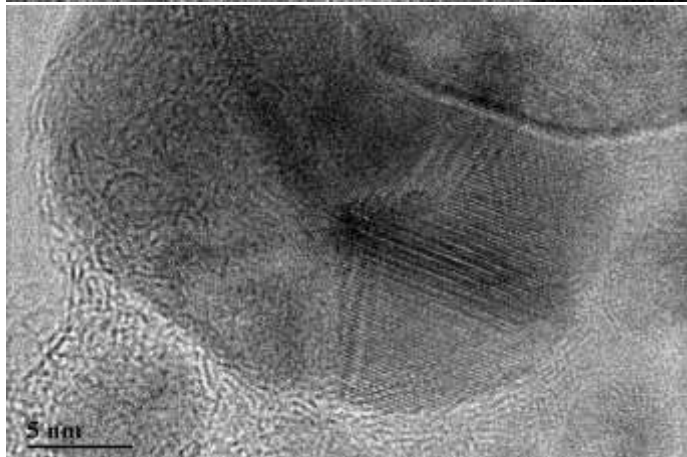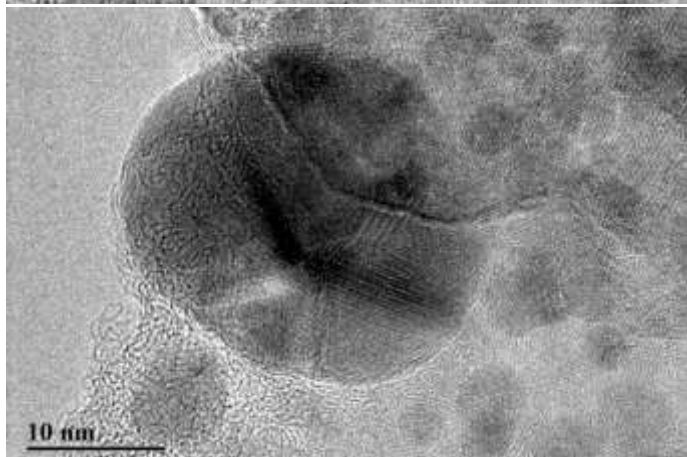

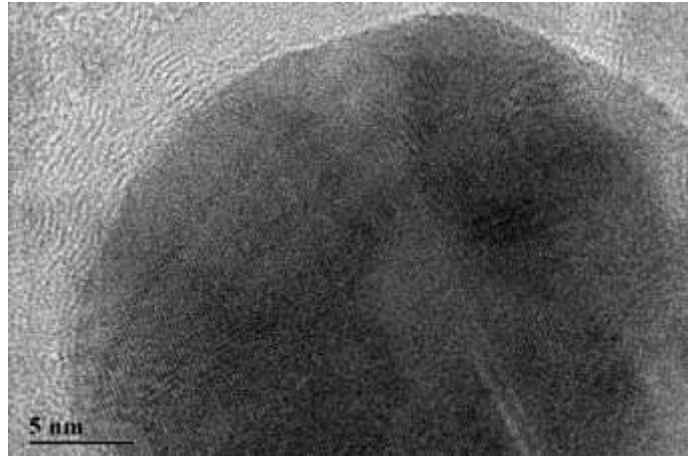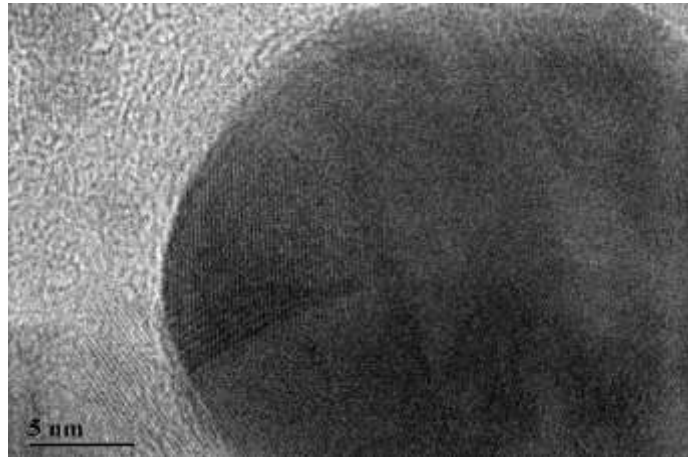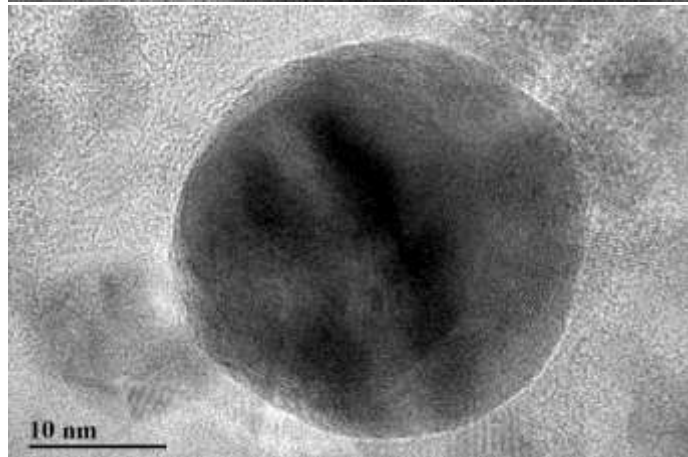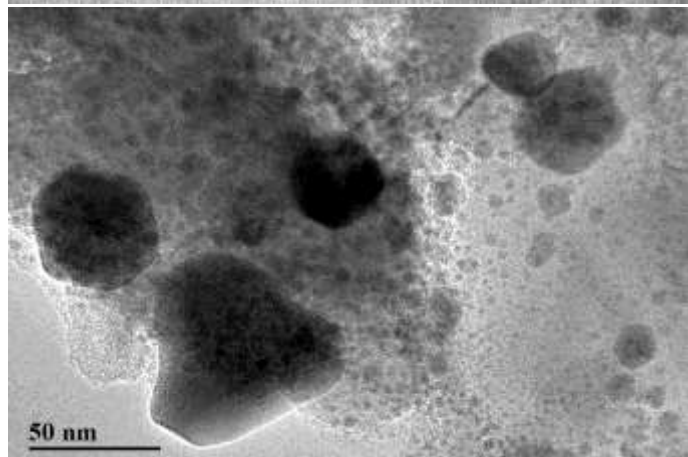

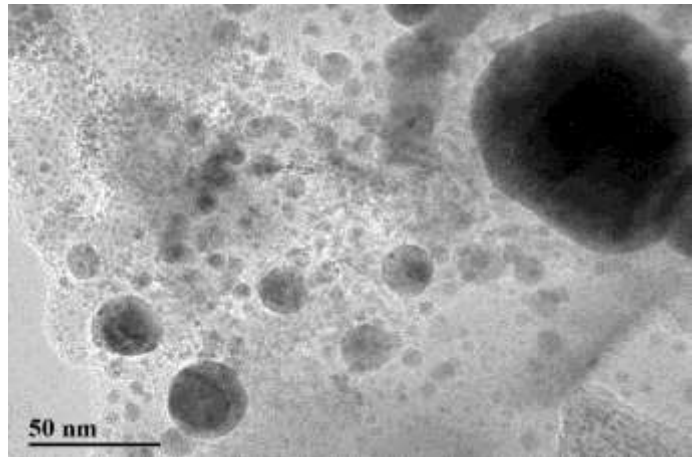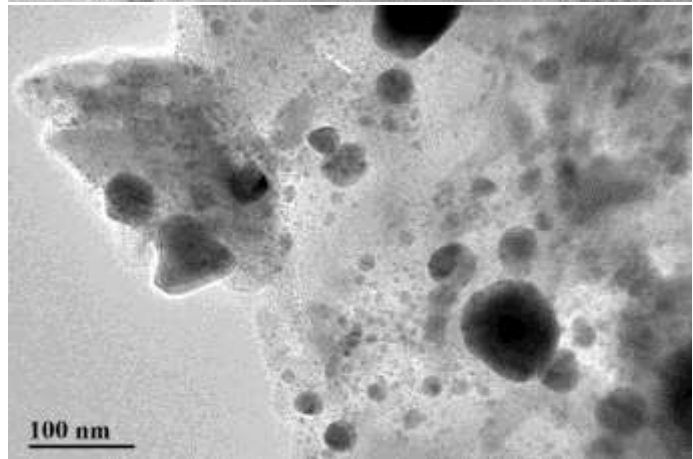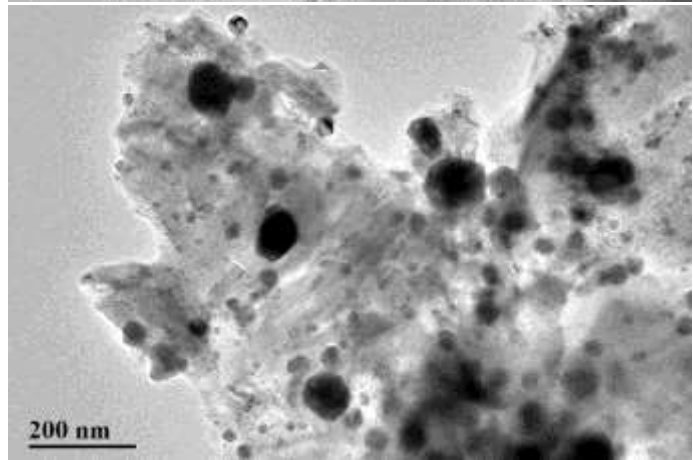



TEM of 20% Pd[OH]<sub>2</sub>/C Sigma-Aldrich (3#).

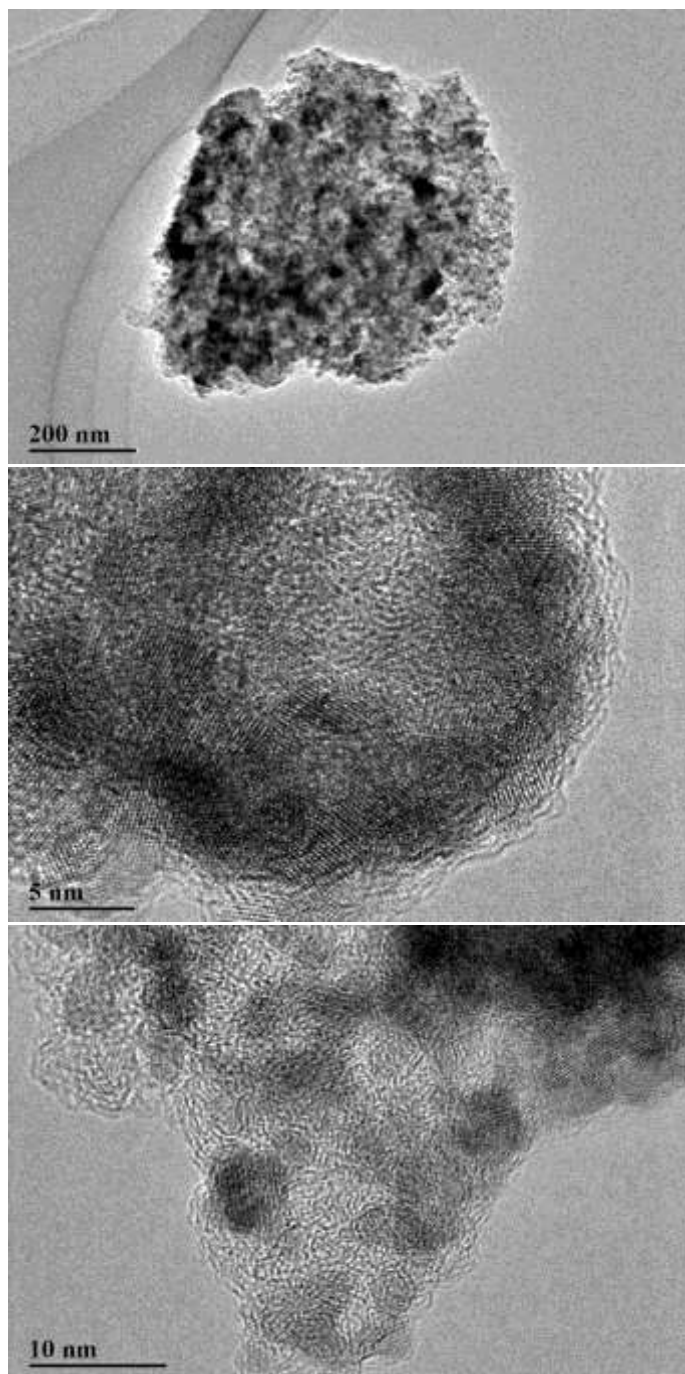



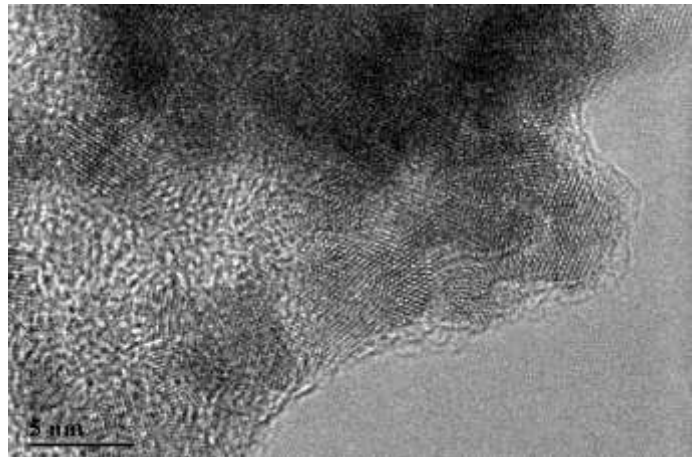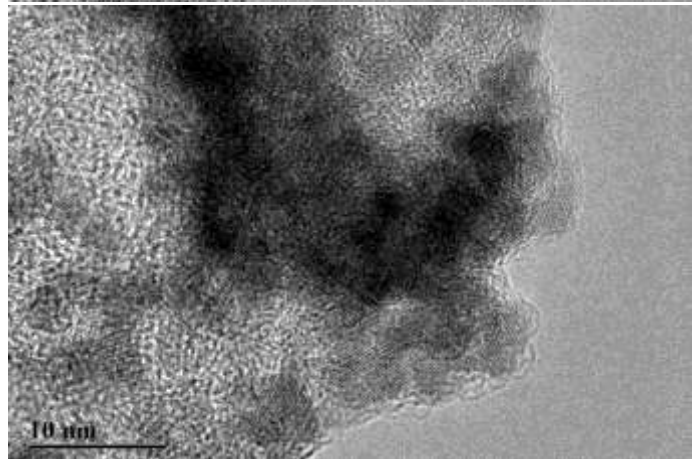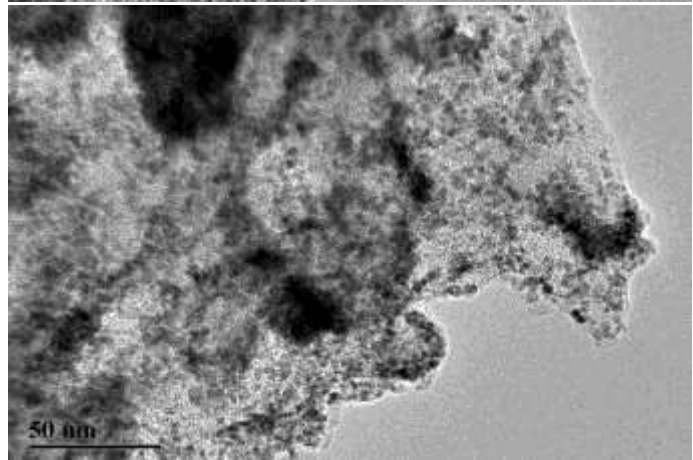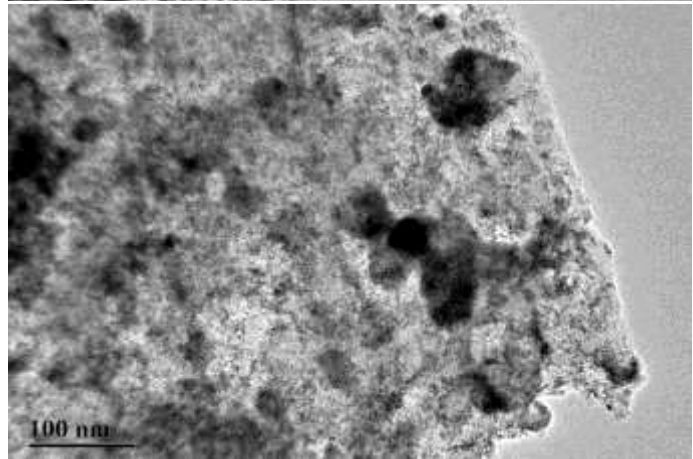

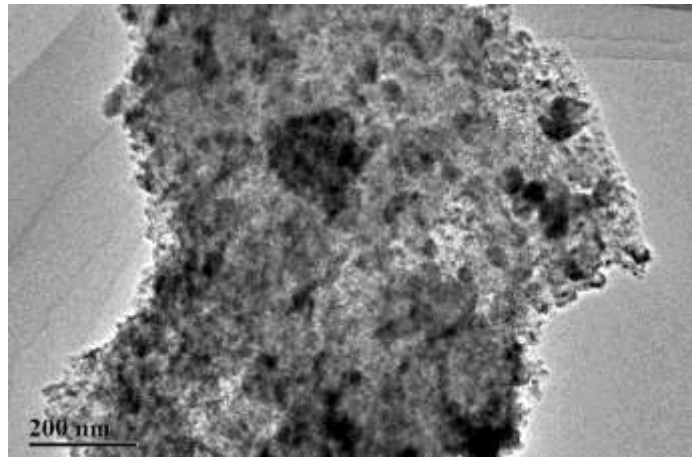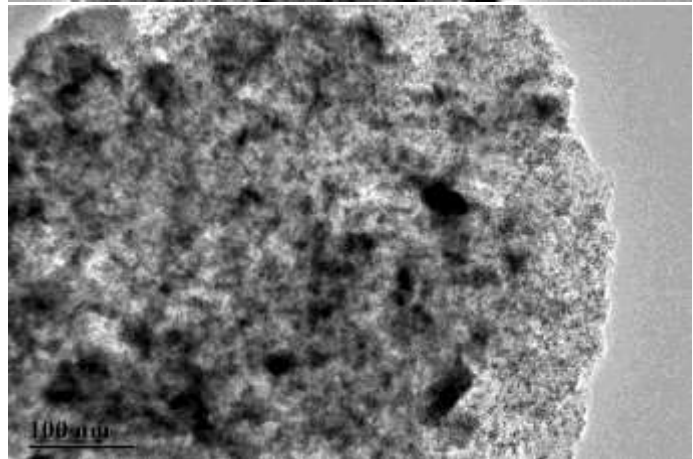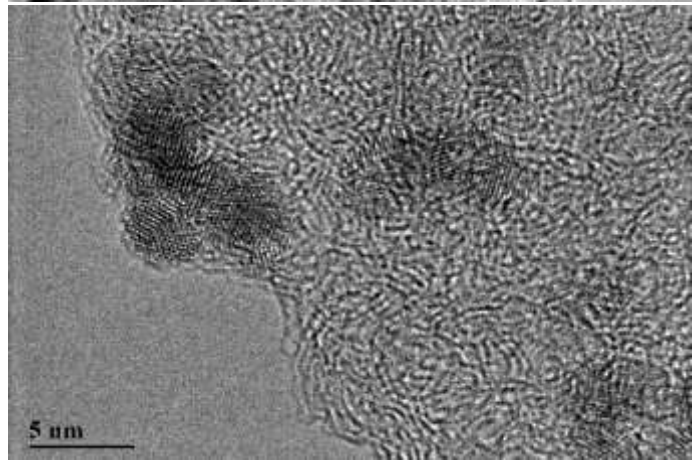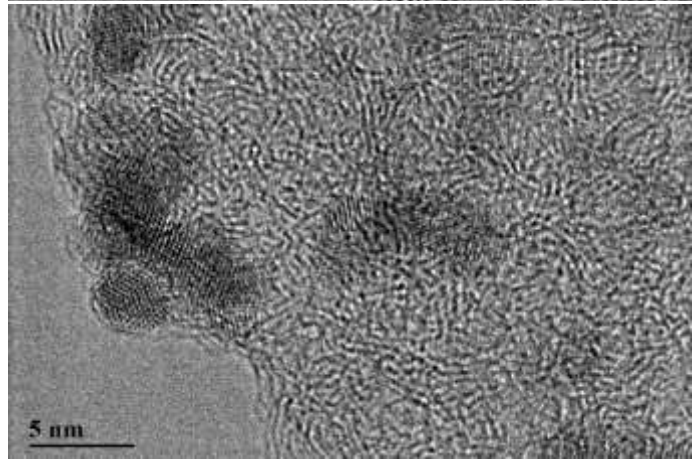

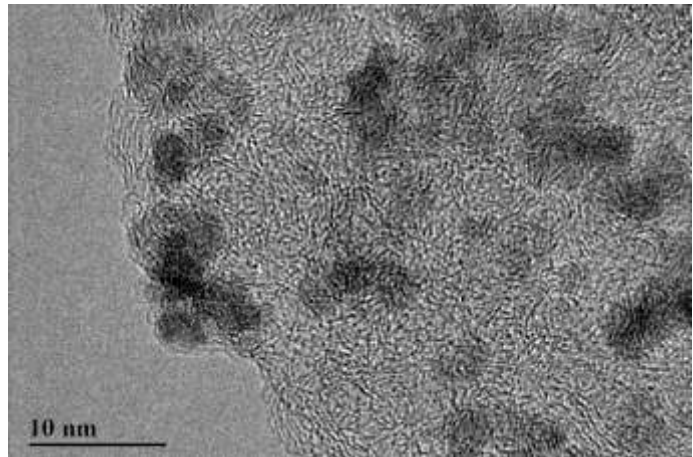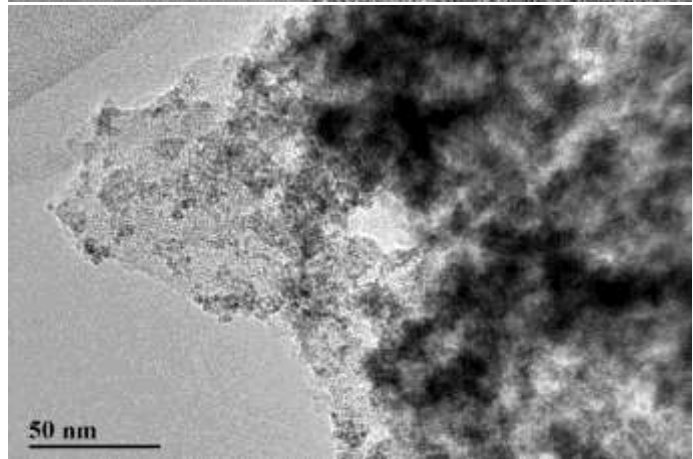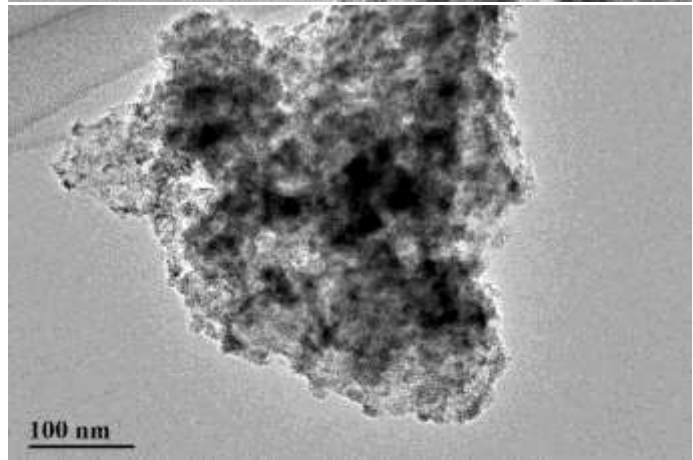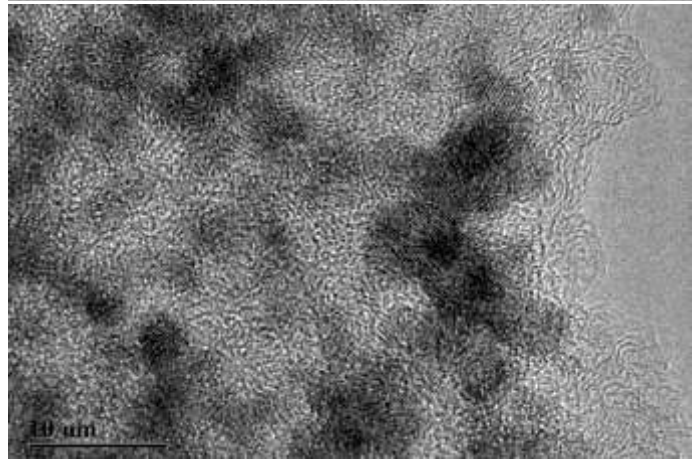

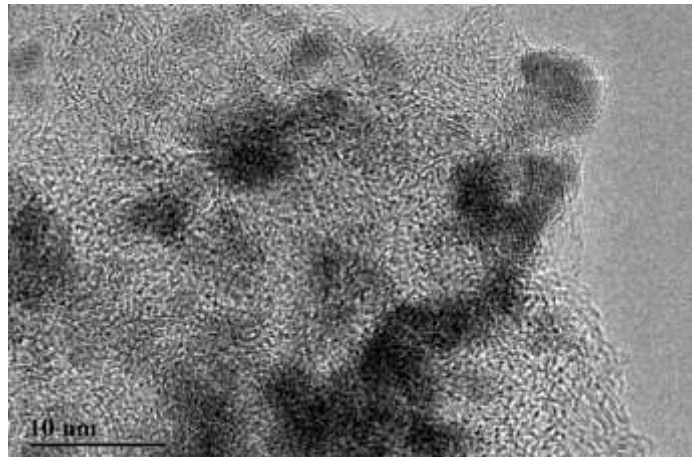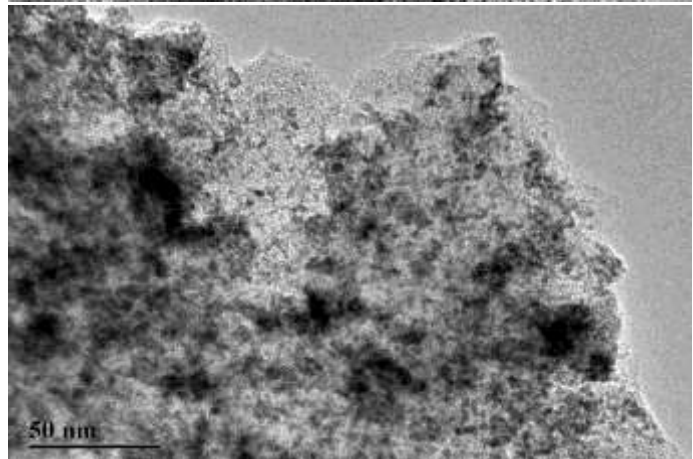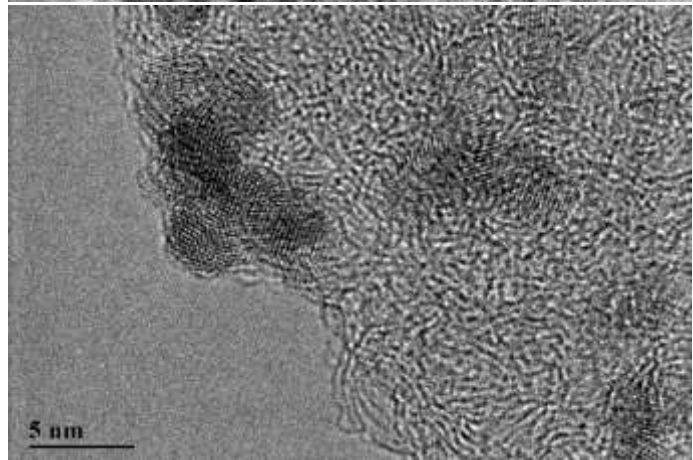

Palladium: PDF 05-0681

Pattern: PDF 05-0681 Radiation: 1.54060 Quality: Star (\*)

| Formula                                                                                                                                                                                                                                                                                                                                                                                                                 |         | Pd              |   | d                   | 2θ      | I fix | h | k | l |
|-------------------------------------------------------------------------------------------------------------------------------------------------------------------------------------------------------------------------------------------------------------------------------------------------------------------------------------------------------------------------------------------------------------------------|---------|-----------------|---|---------------------|---------|-------|---|---|---|
| Name                                                                                                                                                                                                                                                                                                                                                                                                                    |         | Palladium       |   | 2.24600             | 40.115  | 101   | 1 | 1 | 1 |
| Name (mineral)                                                                                                                                                                                                                                                                                                                                                                                                          |         | Palladium, syn  |   | 1.94500             | 46.652  | 43    | 2 | 0 | 0 |
| Name (common)                                                                                                                                                                                                                                                                                                                                                                                                           |         |                 |   | 1.37600             | 68.085  | 26    | 2 | 2 | 0 |
|                                                                                                                                                                                                                                                                                                                                                                                                                         |         |                 |   | 1.17300             | 82.096  | 25    | 3 | 1 | 1 |
|                                                                                                                                                                                                                                                                                                                                                                                                                         |         |                 |   | 1.12320             | 86.598  | 9     | 2 | 2 | 2 |
|                                                                                                                                                                                                                                                                                                                                                                                                                         |         |                 |   | 0.97230             | 104.792 | 4     | 4 | 0 | 0 |
|                                                                                                                                                                                                                                                                                                                                                                                                                         |         |                 |   | 0.89240             | 119.351 | 14    | 3 | 3 | 1 |
|                                                                                                                                                                                                                                                                                                                                                                                                                         |         |                 |   | 0.86970             | 124.677 | 12    | 4 | 2 | 0 |
| Lattice:                                                                                                                                                                                                                                                                                                                                                                                                                |         | Cubic           |   | Mol. weight = 106.4 |         |       |   |   |   |
| S.G.:                                                                                                                                                                                                                                                                                                                                                                                                                   |         | Fm-3m (225)     |   | Volume [CD] = 58.85 |         |       |   |   |   |
|                                                                                                                                                                                                                                                                                                                                                                                                                         |         |                 |   | Dx =                |         |       |   |   |   |
|                                                                                                                                                                                                                                                                                                                                                                                                                         |         |                 |   | Dm =                |         |       |   |   |   |
|                                                                                                                                                                                                                                                                                                                                                                                                                         |         |                 |   | I/Icor = -1.000     |         |       |   |   |   |
| a =                                                                                                                                                                                                                                                                                                                                                                                                                     | 3.88980 | alpha =         |   |                     |         |       |   |   |   |
| b =                                                                                                                                                                                                                                                                                                                                                                                                                     |         | beta =          |   |                     |         |       |   |   |   |
| c =                                                                                                                                                                                                                                                                                                                                                                                                                     |         | gamma =         |   |                     |         |       |   |   |   |
| a/b =                                                                                                                                                                                                                                                                                                                                                                                                                   | 1.00000 | Z =             | 4 |                     |         |       |   |   |   |
| c/b =                                                                                                                                                                                                                                                                                                                                                                                                                   | 1.00000 |                 |   |                     |         |       |   |   |   |
| <p>Color: Black<br/>                     Sample Source Or Locality: Sample from Johnson Matthey Company, Ltd<br/>                     Analysis: Spectroscopic analysis shows &lt;0.1% Ag, Si; &lt;0.01% Ca, Cu, Mg, Pt; 0.0001% Pb<br/>                     Temperature Of Data Collection: Pattern taken at 26 C<br/>                     Deleted By or Rejected By: Deleted by 46-1043; F#N is higher, Mayo 11/94</p> |         |                 |   |                     |         |       |   |   |   |
| <p>Primary Reference<br/>                     Publication: Natl. Bur. Stand. (U.S.), Circ. 539<br/>                     Detail: volume I, page 21 (1953)<br/>                     Authors: Swanson, Tetge.</p>                                                                                                                                                                                                          |         |                 |   |                     |         |       |   |   |   |
| Radiation:                                                                                                                                                                                                                                                                                                                                                                                                              |         | CuKα1           |   | Filter:             |         | F     |   |   |   |
| Wavelength:                                                                                                                                                                                                                                                                                                                                                                                                             |         | 1.54060         |   | d-spacing:          |         |       |   |   |   |
| SS/FOM:                                                                                                                                                                                                                                                                                                                                                                                                                 |         | 55.9 (0.0179,8) |   |                     |         |       |   |   |   |

Palladium oxide: PDF 88-2434

Pattern: PDF 88-2434 Radiation: 1.54060 Quality: Calculated

| <b>Formula</b> Pd O<br><b>Name</b> Palladium Oxide<br><b>Name (mineral)</b><br><b>Name (common)</b> Palladium oxide - HP                                                                                                                                                                                                                                                                                                                                                                                                                                                                                                                                        |                                                                   | <table border="1"> <thead> <tr> <th>d</th> <th>2θ</th> <th>I fix</th> <th>h</th> <th>k</th> <th>l</th> </tr> </thead> <tbody> <tr><td>2.69150</td><td>33.261</td><td>515</td><td>0</td><td>0</td><td>2</td></tr> <tr><td>2.60849</td><td>34.352</td><td>999</td><td>1</td><td>0</td><td>1</td></tr> <tr><td>2.10859</td><td>42.854</td><td>438</td><td>1</td><td>1</td><td>0</td></tr> <tr><td>1.65987</td><td>55.300</td><td>342</td><td>1</td><td>1</td><td>2</td></tr> <tr><td>1.53746</td><td>60.135</td><td>148</td><td>1</td><td>0</td><td>3</td></tr> <tr><td>1.49100</td><td>62.213</td><td>108</td><td>2</td><td>0</td><td>0</td></tr> <tr><td>1.34575</td><td>69.835</td><td>34</td><td>0</td><td>0</td><td>4</td></tr> <tr><td>1.30425</td><td>72.400</td><td>117</td><td>2</td><td>0</td><td>2</td></tr> <tr><td>1.29446</td><td>73.036</td><td>144</td><td>2</td><td>1</td><td>1</td></tr> <tr><td>1.13440</td><td>85.537</td><td>62</td><td>1</td><td>1</td><td>4</td></tr> </tbody> </table> |   |   |   |  |  | d | 2θ | I fix | h | k | l | 2.69150 | 33.261 | 515 | 0 | 0 | 2 | 2.60849 | 34.352 | 999 | 1 | 0 | 1 | 2.10859 | 42.854 | 438 | 1 | 1 | 0 | 1.65987 | 55.300 | 342 | 1 | 1 | 2 | 1.53746 | 60.135 | 148 | 1 | 0 | 3 | 1.49100 | 62.213 | 108 | 2 | 0 | 0 | 1.34575 | 69.835 | 34 | 0 | 0 | 4 | 1.30425 | 72.400 | 117 | 2 | 0 | 2 | 1.29446 | 73.036 | 144 | 2 | 1 | 1 | 1.13440 | 85.537 | 62 | 1 | 1 | 4 |
|-----------------------------------------------------------------------------------------------------------------------------------------------------------------------------------------------------------------------------------------------------------------------------------------------------------------------------------------------------------------------------------------------------------------------------------------------------------------------------------------------------------------------------------------------------------------------------------------------------------------------------------------------------------------|-------------------------------------------------------------------|-------------------------------------------------------------------------------------------------------------------------------------------------------------------------------------------------------------------------------------------------------------------------------------------------------------------------------------------------------------------------------------------------------------------------------------------------------------------------------------------------------------------------------------------------------------------------------------------------------------------------------------------------------------------------------------------------------------------------------------------------------------------------------------------------------------------------------------------------------------------------------------------------------------------------------------------------------------------------------------------------------------|---|---|---|--|--|---|----|-------|---|---|---|---------|--------|-----|---|---|---|---------|--------|-----|---|---|---|---------|--------|-----|---|---|---|---------|--------|-----|---|---|---|---------|--------|-----|---|---|---|---------|--------|-----|---|---|---|---------|--------|----|---|---|---|---------|--------|-----|---|---|---|---------|--------|-----|---|---|---|---------|--------|----|---|---|---|
| d                                                                                                                                                                                                                                                                                                                                                                                                                                                                                                                                                                                                                                                               | 2θ                                                                | I fix                                                                                                                                                                                                                                                                                                                                                                                                                                                                                                                                                                                                                                                                                                                                                                                                                                                                                                                                                                                                       | h | k | l |  |  |   |    |       |   |   |   |         |        |     |   |   |   |         |        |     |   |   |   |         |        |     |   |   |   |         |        |     |   |   |   |         |        |     |   |   |   |         |        |     |   |   |   |         |        |    |   |   |   |         |        |     |   |   |   |         |        |     |   |   |   |         |        |    |   |   |   |
| 2.69150                                                                                                                                                                                                                                                                                                                                                                                                                                                                                                                                                                                                                                                         | 33.261                                                            | 515                                                                                                                                                                                                                                                                                                                                                                                                                                                                                                                                                                                                                                                                                                                                                                                                                                                                                                                                                                                                         | 0 | 0 | 2 |  |  |   |    |       |   |   |   |         |        |     |   |   |   |         |        |     |   |   |   |         |        |     |   |   |   |         |        |     |   |   |   |         |        |     |   |   |   |         |        |     |   |   |   |         |        |    |   |   |   |         |        |     |   |   |   |         |        |     |   |   |   |         |        |    |   |   |   |
| 2.60849                                                                                                                                                                                                                                                                                                                                                                                                                                                                                                                                                                                                                                                         | 34.352                                                            | 999                                                                                                                                                                                                                                                                                                                                                                                                                                                                                                                                                                                                                                                                                                                                                                                                                                                                                                                                                                                                         | 1 | 0 | 1 |  |  |   |    |       |   |   |   |         |        |     |   |   |   |         |        |     |   |   |   |         |        |     |   |   |   |         |        |     |   |   |   |         |        |     |   |   |   |         |        |     |   |   |   |         |        |    |   |   |   |         |        |     |   |   |   |         |        |     |   |   |   |         |        |    |   |   |   |
| 2.10859                                                                                                                                                                                                                                                                                                                                                                                                                                                                                                                                                                                                                                                         | 42.854                                                            | 438                                                                                                                                                                                                                                                                                                                                                                                                                                                                                                                                                                                                                                                                                                                                                                                                                                                                                                                                                                                                         | 1 | 1 | 0 |  |  |   |    |       |   |   |   |         |        |     |   |   |   |         |        |     |   |   |   |         |        |     |   |   |   |         |        |     |   |   |   |         |        |     |   |   |   |         |        |     |   |   |   |         |        |    |   |   |   |         |        |     |   |   |   |         |        |     |   |   |   |         |        |    |   |   |   |
| 1.65987                                                                                                                                                                                                                                                                                                                                                                                                                                                                                                                                                                                                                                                         | 55.300                                                            | 342                                                                                                                                                                                                                                                                                                                                                                                                                                                                                                                                                                                                                                                                                                                                                                                                                                                                                                                                                                                                         | 1 | 1 | 2 |  |  |   |    |       |   |   |   |         |        |     |   |   |   |         |        |     |   |   |   |         |        |     |   |   |   |         |        |     |   |   |   |         |        |     |   |   |   |         |        |     |   |   |   |         |        |    |   |   |   |         |        |     |   |   |   |         |        |     |   |   |   |         |        |    |   |   |   |
| 1.53746                                                                                                                                                                                                                                                                                                                                                                                                                                                                                                                                                                                                                                                         | 60.135                                                            | 148                                                                                                                                                                                                                                                                                                                                                                                                                                                                                                                                                                                                                                                                                                                                                                                                                                                                                                                                                                                                         | 1 | 0 | 3 |  |  |   |    |       |   |   |   |         |        |     |   |   |   |         |        |     |   |   |   |         |        |     |   |   |   |         |        |     |   |   |   |         |        |     |   |   |   |         |        |     |   |   |   |         |        |    |   |   |   |         |        |     |   |   |   |         |        |     |   |   |   |         |        |    |   |   |   |
| 1.49100                                                                                                                                                                                                                                                                                                                                                                                                                                                                                                                                                                                                                                                         | 62.213                                                            | 108                                                                                                                                                                                                                                                                                                                                                                                                                                                                                                                                                                                                                                                                                                                                                                                                                                                                                                                                                                                                         | 2 | 0 | 0 |  |  |   |    |       |   |   |   |         |        |     |   |   |   |         |        |     |   |   |   |         |        |     |   |   |   |         |        |     |   |   |   |         |        |     |   |   |   |         |        |     |   |   |   |         |        |    |   |   |   |         |        |     |   |   |   |         |        |     |   |   |   |         |        |    |   |   |   |
| 1.34575                                                                                                                                                                                                                                                                                                                                                                                                                                                                                                                                                                                                                                                         | 69.835                                                            | 34                                                                                                                                                                                                                                                                                                                                                                                                                                                                                                                                                                                                                                                                                                                                                                                                                                                                                                                                                                                                          | 0 | 0 | 4 |  |  |   |    |       |   |   |   |         |        |     |   |   |   |         |        |     |   |   |   |         |        |     |   |   |   |         |        |     |   |   |   |         |        |     |   |   |   |         |        |     |   |   |   |         |        |    |   |   |   |         |        |     |   |   |   |         |        |     |   |   |   |         |        |    |   |   |   |
| 1.30425                                                                                                                                                                                                                                                                                                                                                                                                                                                                                                                                                                                                                                                         | 72.400                                                            | 117                                                                                                                                                                                                                                                                                                                                                                                                                                                                                                                                                                                                                                                                                                                                                                                                                                                                                                                                                                                                         | 2 | 0 | 2 |  |  |   |    |       |   |   |   |         |        |     |   |   |   |         |        |     |   |   |   |         |        |     |   |   |   |         |        |     |   |   |   |         |        |     |   |   |   |         |        |     |   |   |   |         |        |    |   |   |   |         |        |     |   |   |   |         |        |     |   |   |   |         |        |    |   |   |   |
| 1.29446                                                                                                                                                                                                                                                                                                                                                                                                                                                                                                                                                                                                                                                         | 73.036                                                            | 144                                                                                                                                                                                                                                                                                                                                                                                                                                                                                                                                                                                                                                                                                                                                                                                                                                                                                                                                                                                                         | 2 | 1 | 1 |  |  |   |    |       |   |   |   |         |        |     |   |   |   |         |        |     |   |   |   |         |        |     |   |   |   |         |        |     |   |   |   |         |        |     |   |   |   |         |        |     |   |   |   |         |        |    |   |   |   |         |        |     |   |   |   |         |        |     |   |   |   |         |        |    |   |   |   |
| 1.13440                                                                                                                                                                                                                                                                                                                                                                                                                                                                                                                                                                                                                                                         | 85.537                                                            | 62                                                                                                                                                                                                                                                                                                                                                                                                                                                                                                                                                                                                                                                                                                                                                                                                                                                                                                                                                                                                          | 1 | 1 | 4 |  |  |   |    |       |   |   |   |         |        |     |   |   |   |         |        |     |   |   |   |         |        |     |   |   |   |         |        |     |   |   |   |         |        |     |   |   |   |         |        |     |   |   |   |         |        |    |   |   |   |         |        |     |   |   |   |         |        |     |   |   |   |         |        |    |   |   |   |
| <b>Lattice:</b> Tetragonal<br><b>S.G.:</b> I4/mmm (139)                                                                                                                                                                                                                                                                                                                                                                                                                                                                                                                                                                                                         |                                                                   | <b>Mol. weight =</b> 122.4<br><b>Volume [CD] =</b> 47.87<br><b>Dx =</b><br><b>Dm =</b><br><b>I/floor =</b> 10.080                                                                                                                                                                                                                                                                                                                                                                                                                                                                                                                                                                                                                                                                                                                                                                                                                                                                                           |   |   |   |  |  |   |    |       |   |   |   |         |        |     |   |   |   |         |        |     |   |   |   |         |        |     |   |   |   |         |        |     |   |   |   |         |        |     |   |   |   |         |        |     |   |   |   |         |        |    |   |   |   |         |        |     |   |   |   |         |        |     |   |   |   |         |        |    |   |   |   |
| <b>a =</b> 2.98200<br><b>b =</b><br><b>c =</b> 5.38300<br><b>a/b =</b> 1.00000<br><b>c/b =</b> 1.80516                                                                                                                                                                                                                                                                                                                                                                                                                                                                                                                                                          | <b>alpha =</b><br><b>beta =</b><br><b>gamma =</b><br><b>Z =</b> 2 |                                                                                                                                                                                                                                                                                                                                                                                                                                                                                                                                                                                                                                                                                                                                                                                                                                                                                                                                                                                                             |   |   |   |  |  |   |    |       |   |   |   |         |        |     |   |   |   |         |        |     |   |   |   |         |        |     |   |   |   |         |        |     |   |   |   |         |        |     |   |   |   |         |        |     |   |   |   |         |        |    |   |   |   |         |        |     |   |   |   |         |        |     |   |   |   |         |        |    |   |   |   |
| <p>ICSD Collection Code: 041617<br/>         Remark From ICSD/CSD: REM M Stable above 12 GPa, elongated rocksalt-type<br/>         Remark From ICSD/CSD: REM M Cell at ambient pressure 3.042, 5.351, cp. 24692<br/>         Remark From ICSD/CSD: REM M PDF 43-1024<br/>         Test From ICSD: No R value given<br/>         Test From ICSD: At least one TF missing<br/>         Remark From ICSD/CSD: REM PRE Mentioned<br/>         Article Title: Structural behavior of palladium(II) oxide and a palladium suboxide at high pressure: an energy-dispersive X-raydiffraction study<br/>         Wyckoff Sequence: b a (I4/MMM)<br/>         ANX: AX</p> |                                                                   |                                                                                                                                                                                                                                                                                                                                                                                                                                                                                                                                                                                                                                                                                                                                                                                                                                                                                                                                                                                                             |   |   |   |  |  |   |    |       |   |   |   |         |        |     |   |   |   |         |        |     |   |   |   |         |        |     |   |   |   |         |        |     |   |   |   |         |        |     |   |   |   |         |        |     |   |   |   |         |        |    |   |   |   |         |        |     |   |   |   |         |        |     |   |   |   |         |        |    |   |   |   |
| <p><b>Structure</b><br/>         Publication: Phys. Rev. B: Condens. Matter<br/>         Detail: volume 52, page 9259 (1995)<br/>         Authors: Christy, A.G., Clark, S.M.<br/>         Primary Reference<br/>         Publication: Calculated from ICSD using POWD-12++</p>                                                                                                                                                                                                                                                                                                                                                                                 |                                                                   |                                                                                                                                                                                                                                                                                                                                                                                                                                                                                                                                                                                                                                                                                                                                                                                                                                                                                                                                                                                                             |   |   |   |  |  |   |    |       |   |   |   |         |        |     |   |   |   |         |        |     |   |   |   |         |        |     |   |   |   |         |        |     |   |   |   |         |        |     |   |   |   |         |        |     |   |   |   |         |        |    |   |   |   |         |        |     |   |   |   |         |        |     |   |   |   |         |        |    |   |   |   |
| <b>Radiation:</b> CuKα1<br><b>Wavelength:</b> 1.54060<br><b>SS/FOM:</b> 999.9 (0,10)                                                                                                                                                                                                                                                                                                                                                                                                                                                                                                                                                                            |                                                                   | <b>Filter:</b> Not specified<br><b>d-spacing:</b>                                                                                                                                                                                                                                                                                                                                                                                                                                                                                                                                                                                                                                                                                                                                                                                                                                                                                                                                                           |   |   |   |  |  |   |    |       |   |   |   |         |        |     |   |   |   |         |        |     |   |   |   |         |        |     |   |   |   |         |        |     |   |   |   |         |        |     |   |   |   |         |        |     |   |   |   |         |        |    |   |   |   |         |        |     |   |   |   |         |        |     |   |   |   |         |        |    |   |   |   |

## SEM-EDS

1# Sample, Pd/C STREM Chemicals: Cl=1.7%<sub>wt</sub>

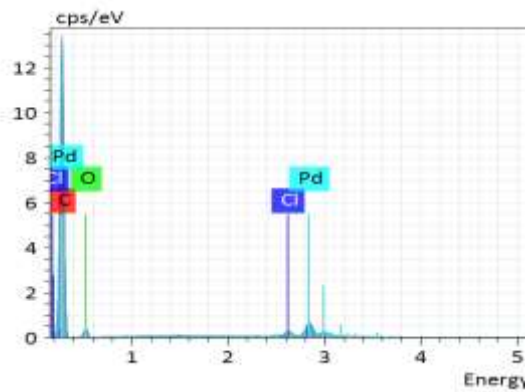

2# Sample, Pd/C Sigma-Aldrich: Cl=0.8%<sub>wt</sub>

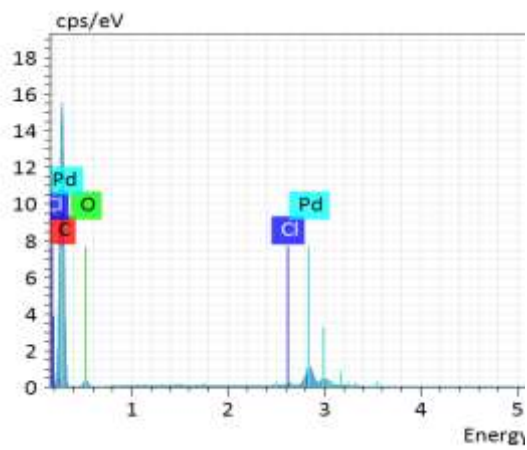

3# Sample, Pd[OH]<sub>2</sub> /C Sigma-Aldrich: negligible

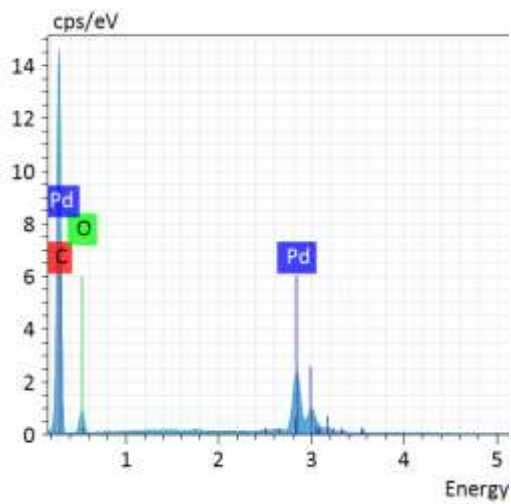

Supplement: op0c00536_si_001.pdf [file op0c00536_si_001.pdf]
